# Supplementary material for: An improved chronology for the Middle Stone Age at El Mnasra cave, Morocco
Source: PLoS One. 2022 Feb 11;17(2):e0261282. doi: 10.1371/journal.pone.0261282 (PMC8836329; doi:10.1371/journal.pone.0261282)
Supplement: S9 Table — (XLSX) [file pone.0261282.s009.xlsx]

## Sheet: Sheet1
US	Large mammals	Mesofauna	Microfauna	Associated climate	Environnement
1
2
3
4			Rodentia: Mus spretus, Meriones shawii/grandis, Jaculus sp.; Soricomorpha: Crocidura sp.; Chiroptera; Amphibia: Pleurodeles cf. waltl, Bufo spp. (B. bufo, B. mauritanicus), Discoglossus scovazzi, Hyla meridionalis, cf. Pelophylax saharicus; Squamata: Trogonophis wiegmanni, Blanus sp., Gekkonidae, Lacertidae, Scincidae, Coronella girondica, Malpolon monspessulanus, Natrix spp., Coluber/Hemorrhois …	Arid ? (MIS 2?)	Probably open and arid environment with the persistence of waterbodies bordered by vegetation
5
6
7	Herbivores: Bos primigenius, Gazella dorcas/atlantica.	Chelonia: Testudo sp.
8a	Herbivores: Phacochoerus africanus, Sus scrofa, Hippopotamus amphibius, Equus sp., Bos primigenius, Alcelaphus buselaphus, Connochaetes taurinus (5A), Gazella dorcas, Gazella atlantica; Carnivores: Mellivora capensis.	Rodentia: Hystrix cf. cristata; Chelonia: Testudo sp.
8b	Herbivores: Sus scrofa, Equus sp., Bos primigenius, Connochaetes taurinus, Oryx cf. dammah, Gazella dorcas/atlantica ; Carnivores: Vulpes vulpes	Chelonia: cf. Mauremys, Testudo sp.; Lagomorpha: Lepus cf. capensis	Rodentia: Mus spretus, Meriones shawii/grandis, Gerbillus sp., Arvicanthis sp.; Soricomorpha: Crocidura sp.; Chiroptera; Amphibia: Bufo spp. (B. bufo, B. mauritanicus), Discoglossus scovazzi, Hyla meridionalis, Pelobates cf. varaldii; Squamata: Trogonophis wiegmanni, Anguidae?, Gekkonidae, Lacertidae, Scincidae, Coronella girondica, Malpolon monspessulanus, Natrix spp.; Birds; Fish.	Relatively humid period	Savanna-like landscape
8c/d	Herbivores: Stephanorhinus hemitoechus, Equus sp., Phacochoerus africanus, Sus scrofa, Bos primigenius, Connochaetes taurinus, Oryx cf. dammah, Gazella dorcas/atlantica, ; Carnivores: Vulpes sp.	Rodentia: Hystrix cf. cristata; Chelonia: cf. Mauremys, Testudo sp.	Micromammals: in progress; Amphibia: Hyla meridionalis; Squamata: Trogonophis wiegmanni, Lacertidae, Scincidae, Malpolon monspessulanus.
9a
9b
9c		Chelonia: cf. Mauremys, Testudo sp.	Micromammals: in progress; Amphibia: Bufo spp. (B. bufo, B. mauritanicus); Squamata: Scincidae, Coronella girondica.
9d/9e/9f/10a	Herbivores: Phacochoerus africanus	Chelonia: cf. Testudo sp.	Rodentia: Mus spretus, Meriones shawii/grandis, Gerbillus sp.; Soricomorpha: Crocidura sp.; Chiroptera; Amphibia: Bufo spp. (B. bufo, B. mauritanicus), Discoglossus scovazzi, Hyla meridionalis; Squamata: Trogonophis wiegmanni, Anguidae?, Gekkonidae, Lacertidae, Scincidae, Coronella girondica, Malpolon monspessulanus; Birds.	Relatively humid period	Semi-open landscape (wooded steppes or meadows), with soft waterbodies in the vicinity of the cave
10b/10c/11			Rodentia: Mus spretus, Meriones shawii/grandis, Gerbillus sp.; Erinaceomorpha: Atelerix algirus; Soricomorpha: Crocidura sp.; Chiroptera; Amphibia: Bufo spp. (B. bufo, B. mauritanicus); Squamata: Trogonophis wiegmanni, Lacertidae, Scincidae; Birds; Fish.
